# Supplementary figures and images for: Electrochemical determination of purine and pyrimidine bases using a 1,10-phenanthroline–Fe3O4 nanoparticles–graphene oxide–chitosan nanocomposite
Source: Royal Society of Chemistry journal article supplement (doi:10.1039/d2ay01069k), 2022-01-01

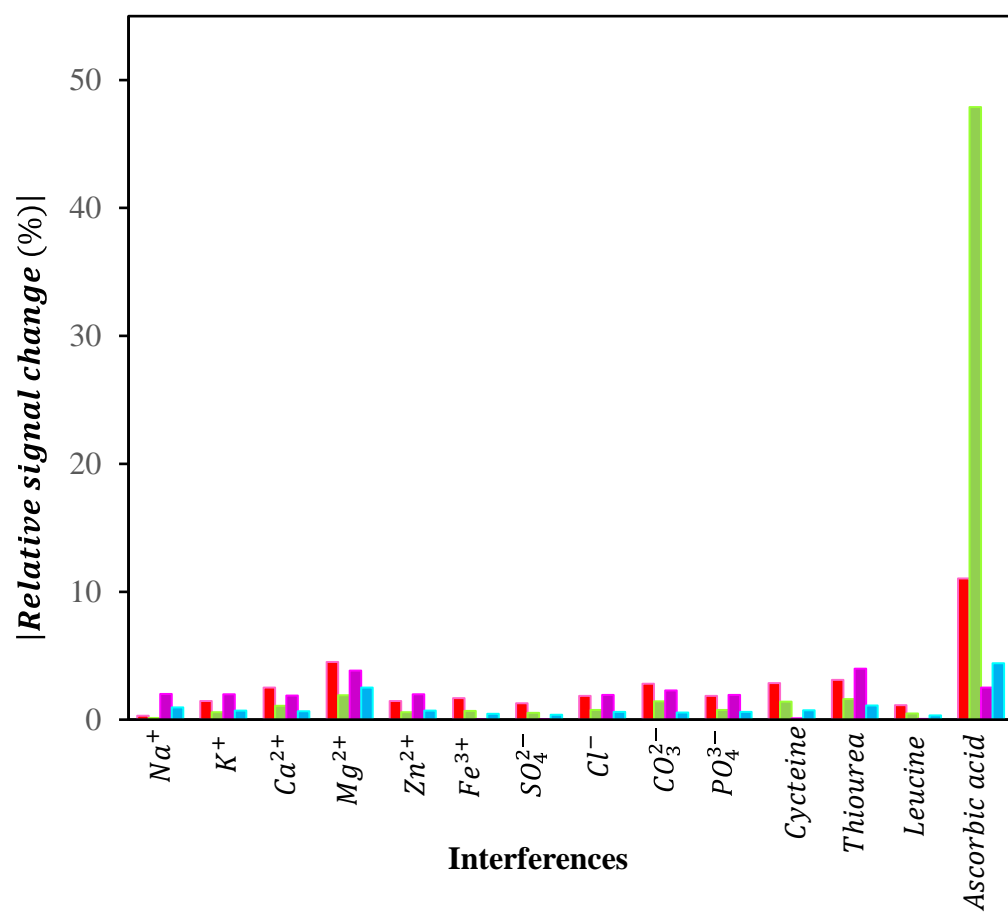

Supplement: d2ay01069k1.pdf [file d2ay01069k1.pdf]

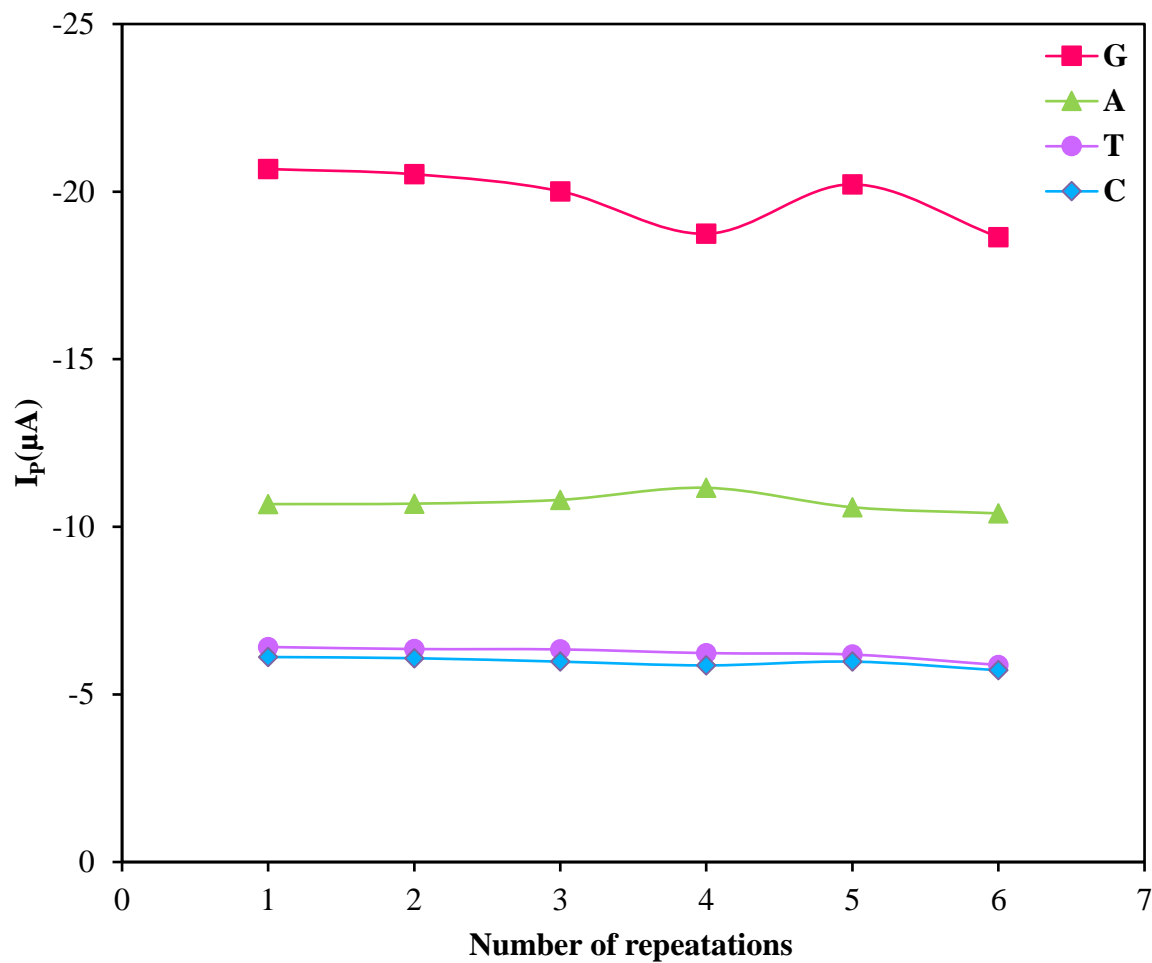

Supplement: d2ay01069k2.pdf [file d2ay01069k2.pdf]

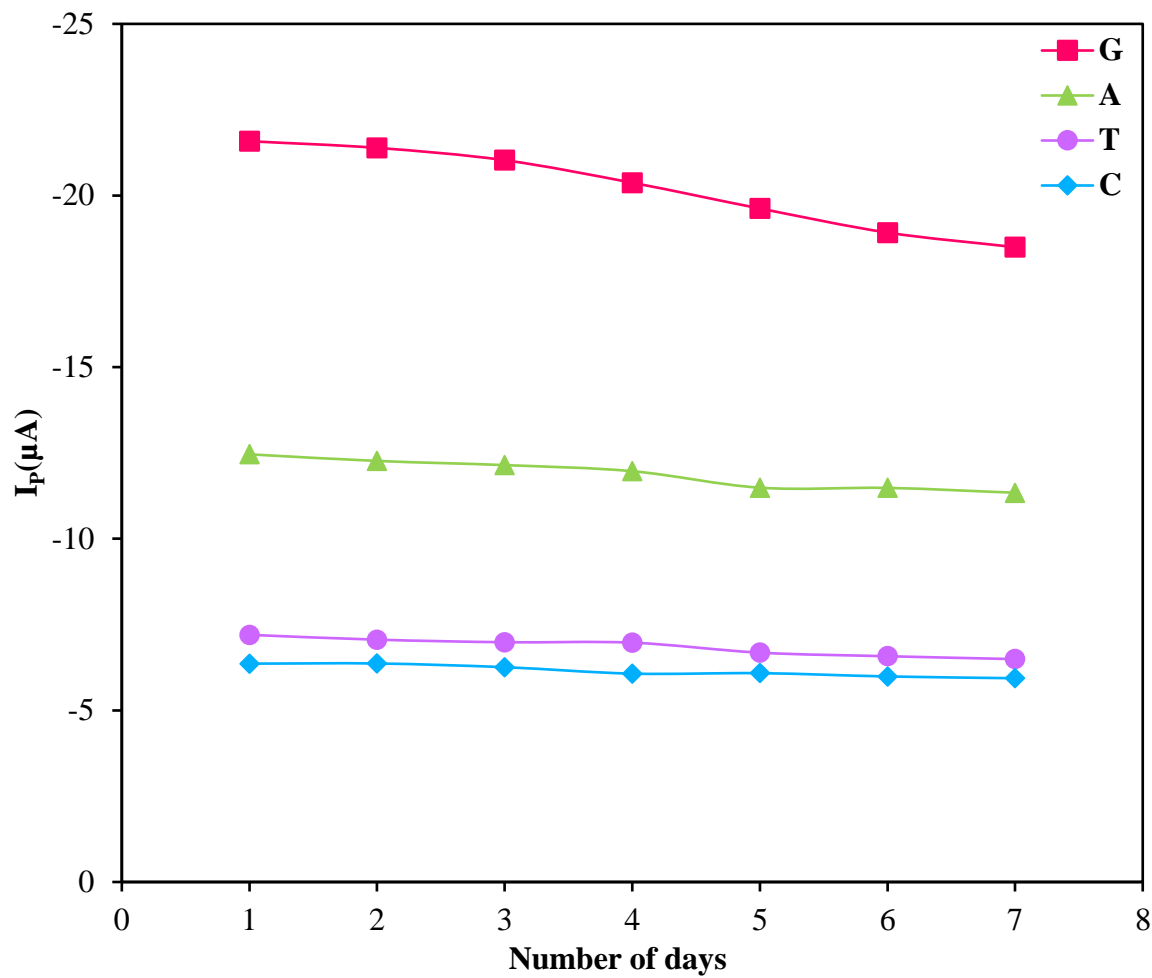

Supplement: d2ay01069k3.pdf [file d2ay01069k3.pdf]
